# Supplementary material for: Overview of multifunctional cysteinyl cathepsins in atherosclerosis-based cardiovascular disease: from insights into molecular functions to clinical implications
Source: Springer Nature journal article supplement (doi:10.1186/s13578-023-01040-4), 2023-05-19
Supplement: 13578_2023_1040_MOESM1_ESM.pdf [file 13578_2023_1040_MOESM1_ESM.pdf]

**Suppl. Table S1.** Different factors regulate cathepsin expression in cardiovascular system

| Target cells             | IL-8, Insulin-like growth factor II receptor                      | Target cathepsins (CTSs) | Expression change | Refs.   |
|--------------------------|-------------------------------------------------------------------|--------------------------|-------------------|---------|
| Endothelial cells        | PPAR- $\alpha$ agonist Wy14643                                    | Cathepsin B              | Increase          | 1, 2    |
|                          | Advanced glycation end products                                   | Cathepsin B              | Decrease          | 3       |
|                          | FGF2, IFN- $\gamma$ , IL-1 $\beta$ , IL-6, LPS, TNF- $\alpha$     | Cathepsin D              | Decrease          | 4       |
|                          | Oscillatory shear stress                                          | Cathepsins S, K, L       | Increase          | 5, 6    |
|                          | FGF2, IFN- $\gamma$ , IL-1 $\beta$ , TNF- $\alpha$                | Cathepsins K, L          | Increase          | 6, 7    |
| Vascular smooth muscle   | TIN-ag-RP                                                         | Cathepsins L, S          | Increase          | 5, 8    |
|                          | Advanced glycation end products                                   | Cathepsin B              | Decrease          | 9       |
|                          | CpG ODNs, IFN- $\gamma$ , IL-1 $\beta$ , IL-6, LPS, TNF- $\alpha$ | Cathepsin D              | Decrease          | 10      |
| Macrophages              | Angiotensin II                                                    | Cathepsins S, K, L       | Increase          | 5,11,12 |
|                          | Serum from patients with rheumatoid arthritis                     | Cathepsin F              | Increase          | 13      |
|                          | Interferon-c                                                      | Cathepsin B              | Increase          | 14      |
|                          | Oxidized LDL cholesterol                                          | Cathepsin B              | Increase          | 15      |
|                          | Amyloid- $\beta_{40}$ , amyloid- $\beta_{42}$                     | Cathepsins S, K          | Increase          | 16, 17  |
|                          | TNF- $\alpha$                                                     | Cathepsin S              | Increase          | 18      |
|                          | IL-4, IL-10, IL-13                                                | Cathepsin S              | Increase          | 19      |
| Oscillatory shear stress | Cathepsin K                                                       | Decrease                 | 20                |         |
| Neutrophils              | 2',3-dihydroxy-5-methoxybiphenyl                                  | Cathepsin B              | Increase          | 21      |
|                          | PPAR- $\gamma$                                                    | Cathepsin G              | Decrease          | 22      |

Abbreviations: CpG ODN, CpG oligodeoxynucleotide; FGF2, fibroblast growth factor 2; IFN- $\gamma$ , interferon-gamma; LDL, low-density lipoprotein; IL, Interleukin; LPS, lipopolysaccharide; PPAR, peroxisome proliferator-activated receptor; TNF- $\alpha$ , tumor necrosis factor-alpha.

## References

1. Rose PP, Bogyo M, Moses AV and Fruh K. Insulin-like growth factor II receptor-mediated intracellular retention of cathepsin B is essential for transformation of endothelial cells by Kaposi's sarcoma-associated herpesvirus. *Journal of virology*. 2007;81:8050-62.
2. Schraufstatter IU, Trieu K, Zhao M, Rose DM, Terkeltaub RA and Burger M. IL-8-mediated cell migration in endothelial cells depends on cathepsin B activity and transactivation of the epidermal growth factor receptor. *Journal of immunology* (Baltimore, Md : 1950). 2003;171:6714-22.
3. Reichenbach G, Starzinski-Powitz A, Sloane BF, Doll M, Kippenberger S, Bernd A, Kaufmann R and Meissner M. PPARalpha agonist Wy14643 suppresses cathepsin B in human endothelial cells via transcriptional, post-transcriptional and post-translational mechanisms. *Angiogenesis*. 2013;16:223-33.
4. Li Y, Chang Y, Ye N, Dai D, Chen Y, Zhang N, Sun G and Sun Y. Advanced Glycation End Products Inhibit the Proliferation of Human Umbilical Vein Endothelial Cells by Inhibiting Cathepsin D. *International journal of molecular sciences*. 2017;18.
5. Liu J, Sukhova GK, Yang JT, Sun JS, Ma LK, Ren A, Xu WH, Fu HX, Dolganov GM, Hu CC, Libby P and Shi GP. Cathepsin L expression and regulation in human abdominal aortic aneurysm, atherosclerosis, and vascular cells. *Atherosclerosis*. 2006;184:302-311.
6. Platt MO, Ankeny R and Jo HJ. Laminar shear stress inhibits cathepsin L activity in endothelial cells. *Arterioscl Throm Vas*. 2006;26:E89-E89.
7. Platt MO, Ankeny RF, Shi GP, Weiss D, Vega JD, Taylor WR and Jo H. Expression of cathepsin K is regulated by shear stress in cultured endothelial cells and is increased in endothelium in human atherosclerosis. *American journal of physiology Heart and circulatory physiology*. 2007;292:H1479-86.
8. Sukhova GK, Shi GP, Simon DI, Chapman HA and Libby P. Expression of the elastolytic cathepsins S and K in human atheroma and regulation of their production in smooth muscle cells. *Journal of Clinical Investigation*. 1998;102:576-583.
9. Wex T, Lipyansky A, Bromme NC, Wex H, Guan XQ and Bromme D. TIN-ag-RP, a novel catalytically inactive cathepsin B-related protein with EGF domains, is predominantly expressed in vascular smooth muscle cells. *Biochemistry*. 2001;40:1350-7.

10. Ma M, Guo X, Chang Y, Li C, Meng X, Li S, Du ZX, Wang HQ and Sun Y. Advanced glycation end products promote proliferation and suppress autophagy via reduction of Cathepsin D in rat vascular smooth muscle cells. *Molecular and cellular biochemistry*. 2015;403:73-83.
11. Kitamura H, Kamon H, Sawa S, Park SJ, Katunuma N, Ishihara K, Murakami M and Hirano T. IL-6-STAT3 controls intracellular MHC class II alphabeta dimer level through cathepsin S activity in dendritic cells. *Immunity*. 2005;23:491-502.
12. Cheng XW, Kuzuya M, Nakamura K, Di Q, Liu ZX, Sasaki T, Kanda S, Jin H, Shi GP, Murohara T, Yokota M and Iguchi A. Localization of cysteine protease, cathepsin S, to the surface of vascular smooth muscle cells by association with integrin alpha nu beta 3. *American Journal of Pathology*. 2006;168:685-694.
13. Kaakinen R, Lindstedt KA, Sneek M, Kovanen PT and Oorni K. Angiotensin II increases expression and secretion of cathepsin F in cultured human monocyte-derived macrophages: an angiotensin II type 2 receptor-mediated effect. *Atherosclerosis*. 2007;192:323-7.
14. Ostensen M, Morland B and Husby G. Stimulation of murine macrophage cathepsin B by serum from patients with rheumatoid arthritis: an indicator of disease activity. *Clinical and experimental immunology*. 1983;51:103-9.
15. Li Q, Ding L and Bever CT, Jr. Interferon-c induces cathepsin B expression in a human macrophage-like cell line by increasing both transcription and mRNA stability. *International journal of molecular medicine*. 1998;2:181-186.
16. Burns-Kurtis CL, Olzinski AR, Needle S, Fox JH, Capper EA, Kelly FM, McQueney MS and Romanic AM. Cathepsin S expression is up-regulated following balloon angioplasty in the hypercholesterolemic rabbit. *Cardiovascular research*. 2004;62:610-620.
17. Vasiljeva O, Papazoglou A, Kruger A, Brodoefel H, Korovin M, Deussing J, Augustin N, Nielsen BS, Almholt K, Bogoyo M, Peters C and Reinheckel T. Tumor cell-derived and macrophage-derived cathepsin B promotes progression and lung metastasis of mammary cancer. *Cancer research*. 2006;66:5242-50.
18. Castellano J, Badimon L and Llorente-Cortes V. Amyloid-beta Increases Metallo- and Cysteine Protease Activities in Human Macrophages. *J Vasc Res*. 2014;51:58-67.
19. Lindahl C, Simonsson M, Bergh A, Thysell E, Antti H, Sund M and Wikstrom P. Increased levels of macrophage-secreted cathepsin S during prostate cancer progression in TRAMP mice and patients. *Cancer genomics & proteomics*. 2009;6:149-59.

20. Luger N, Kucharzik T, Stein H, Winde G, Luger A, Hasilik A, Domschke W and Stoll R. IL-10 synergizes with IL-4 and IL-13 in inhibiting lysosomal enzyme secretion by human monocytes and lamina propria mononuclear cells from patients with inflammatory bowel disease. *Dig Dis Sci.* 1998;43:706-14.
21. Akenhead ML, Fukuda S, Schmid-Schonbein GW and Shin HY. Fluid shear-induced cathepsin B release in the control of Mac1-dependent neutrophil adhesion. *Journal of leukocyte biology.* 2017;102:4-126.
22. Liao HR, Chen IS, Liu FC, Lin SZ and Tseng CP. 2',3-dihydroxy-5-methoxybiphenyl suppresses fMLP-induced superoxide anion production and cathepsin G release by targeting the beta-subunit of G-protein in human neutrophils. *European journal of pharmacology.* 2018;829:26-37..
